# Supplementary material for: Significant Upregulation of HERV-K (HML-2) Transcription Levels in Human Lung Cancer and Cancer Cells
Source: PubMed Central journal article supplement (PMC8960717; doi:10.3389/fmicb.2022.850444), 2022-03-10
Supplement: Image_1.pdf [file Image_1.pdf]

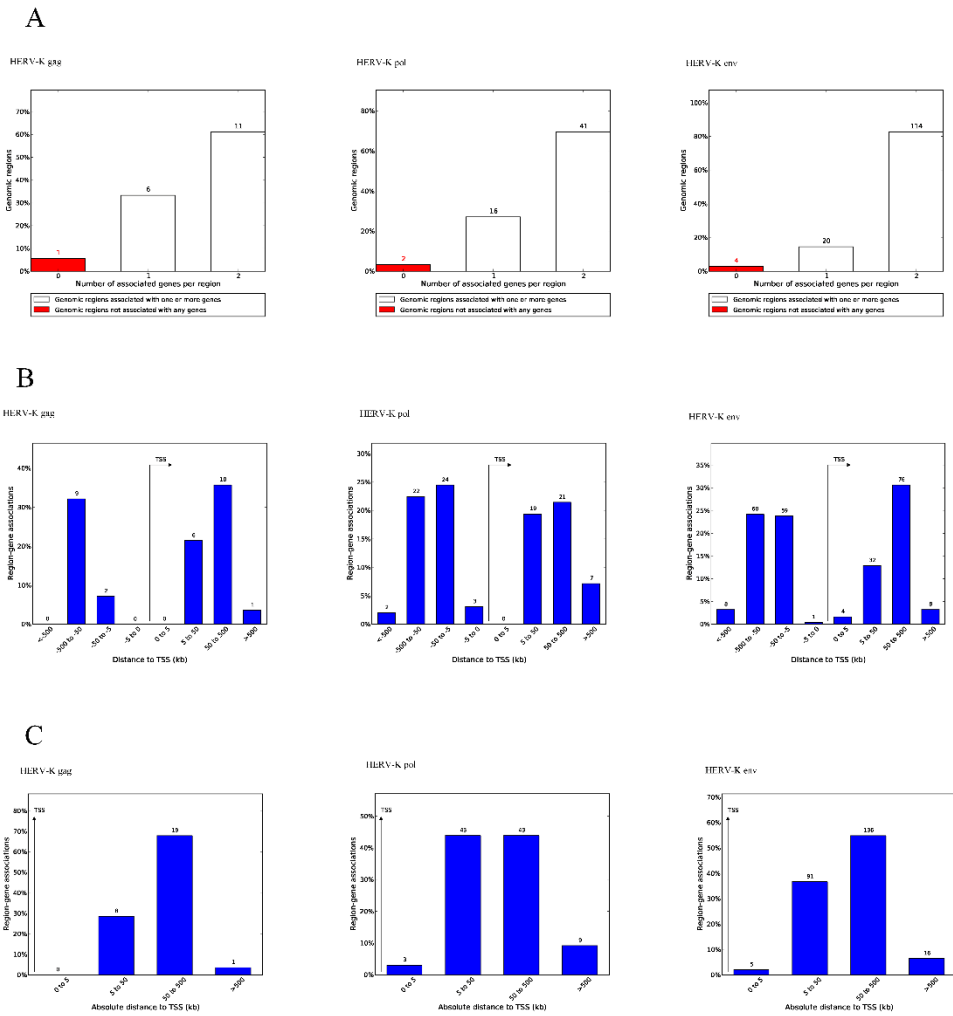

**Supplementary FIGURE S1. The associations between each HERV-K(HML-2) and the gene(s) it putatively regulates. (A)The number of associated genes per HERV-K(HML-2). (B) Binned by orientation and distance to TSS. (C) Binned by absolute distance to TSS.**
