# Supplementary material for: Significant Upregulation of HERV-K (HML-2) Transcription Levels in Human Lung Cancer and Cancer Cells
Source: PubMed Central journal article supplement (PMC8960717; doi:10.3389/fmicb.2022.850444), 2022-03-10
Supplement: Table_1.pdf [file Table_1.pdf]

**Supplementary Table 1.** HERV-K (HML-2) gene annotation.

# GREAT version 4.0.4

Species assembly: hg38

Association rule: Basal+extension: 5000 bp upstream, 1000 bp downstream, 1000000 bp max extension, curated regulatory domains included

GAG-gene to region

|          |                                                      |
|----------|------------------------------------------------------|
| ABCC2    | unnamed (+44327)                                     |
| AGTR1    | unnamed (-163470)                                    |
| ALG1L    | unnamed (+42503)                                     |
| ANO2     | unnamed (+110299)                                    |
| ATP23    | unnamed (+393471)                                    |
| BOC      | unnamed (-180952)                                    |
| CEP126   | unnamed (-218086)                                    |
| DDX6     | unnamed (+62640)                                     |
| DEFB107A | unnamed (+310238)                                    |
| DEFB107B | unnamed (+9632)                                      |
| DNMBP    | unnamed (+182860)                                    |
| FOXK1    | unnamed (-92279), unnamed (-92089), unnamed (-83776) |
| KMT2E    | unnamed (-262256)                                    |
| LHFPL3   | unnamed (+423267)                                    |
| LHX8     | unnamed (+250518)                                    |
| LRIG3    | unnamed (+585474)                                    |
| MEI4     | unnamed (+33849), unnamed (+34039)                   |
| MSTO1    | unnamed (+23753)                                     |
| NEPRO    | unnamed (-11737)                                     |
| NTF3     | unnamed (+403820)                                    |
| OSBPL11  | unnamed (-296880)                                    |
| SLC44A5  | unnamed (+232132)                                    |
| TREH     | unnamed (-48635)                                     |
| TRPC6    | unnamed (-113001)                                    |
| YY1AP1   | unnamed (+54678)                                     |

GAG-region to gene

|         |                                   |
|---------|-----------------------------------|
| unnamed | FOXK1 (-92089)                    |
| unnamed | MEI4 (+34039)                     |
| unnamed | OSBPL11 (-296880), ALG1L (+42503) |
| unnamed | ANO2 (+110299), NTF3 (+403820)    |
| unnamed | CEP126 (-218086), TRPC6 (-113001) |

|         |                                      |
|---------|--------------------------------------|
| unnamed | DEFB107B (+9632), DEFB107A (+310238) |
| unnamed | KMT2E (-262256), LHFPL3 (+423267)    |
| unnamed | FOXK1 (-92279)                       |
| unnamed | FOXK1 (-83776)                       |
| unnamed | MEI4 (+33849)                        |
| unnamed | AGTR1 (-163470)                      |
| unnamed | BOC (-180952), NEPRO (-11737)        |
| unnamed | NONE                                 |
| unnamed | ATP23 (+393471), LRIG3 (+585474)     |
| unnamed | ABCC2 (+44327), DNMBP (+182860)      |
| unnamed | MSTO1 (+23753), YY1AP1 (+54678)      |
| unnamed | TREH (-48635), DDX6 (+62640)         |
| unnamed | SLC44A5 (+232132), LHX8 (+250518)    |

POL-gene to region

|                 |                                                                           |
|-----------------|---------------------------------------------------------------------------|
| ABCC2           | unnamed (+40356), unnamed (+40476)                                        |
| ALG10           | unnamed (+601338), unnamed (+601458)                                      |
| ALG1L           | unnamed (+38338)                                                          |
| ASRGL1          | unnamed (+39526), unnamed (+39646)                                        |
| ATP23           | unnamed (+389508), unnamed (+389628)                                      |
| ATP4A           | unnamed (-11552)                                                          |
| BOC             | unnamed (-184806)                                                         |
| C6orf226        | unnamed (-6650)                                                           |
| C8orf33         | unnamed (-27325)                                                          |
| CD48            | unnamed (+15149)                                                          |
| CDH6            | unnamed (-703480), unnamed (-703360)                                      |
| CEP126          | unnamed (-214117)                                                         |
| CEP97           | unnamed (-26365)                                                          |
| CTAG1A          | unnamed (+27045)                                                          |
| CTAG1B          | unnamed (+7072)                                                           |
| DDX6            | unnamed (+66483)                                                          |
| DEFB107A        | unnamed (+314092), unnamed (+314212)                                      |
| DEFB107B        | unnamed (+5658), unnamed (+5778)                                          |
| DGCR2           | unnamed (+177940), unnamed (+178060)                                      |
| DNMBP           | unnamed (+186711), unnamed (+186831)                                      |
| DUX4            | unnamed (-63940)                                                          |
| EDA2R           | unnamed (+151356)                                                         |
| ENSA            | unnamed (-4111), unnamed (-3991)                                          |
| ENSG00000283758 | unnamed (-11050)                                                          |
| FOXK1           | unnamed (-96254), unnamed (-96134), unnamed (-87750),<br>unnamed (-87630) |
| FRG2            | unnamed (-82580)                                                          |

|          |                                      |
|----------|--------------------------------------|
| GBP1     | unnamed (-22886)                     |
| GBP2     | unnamed (+37868)                     |
| HCN1     | unnamed (-307160)                    |
| HEPH     | unnamed (+302125)                    |
| HOXB1    | unnamed (+47424)                     |
| LCN15    | unnamed (-18191)                     |
| LIPH     | unnamed (-13392), unnamed (-13272)   |
| LRIG3    | unnamed (+589317), unnamed (+589437) |
| MEI4     | unnamed (+29999)                     |
| MSTO1    | unnamed (+19778), unnamed (+19898)   |
| NEPRO    | unnamed (-7883)                      |
| OSBPL11  | unnamed (-301045)                    |
| POGK     | unnamed (-231023)                    |
| PPP1R2P3 | unnamed (-189495), unnamed (-189375) |
| PRAMEF13 | unnamed (-14601)                     |
| PRAMEF14 | unnamed (-11350)                     |
| PRAMEF18 | unnamed (+13375)                     |
| PRAMEF19 | unnamed (+13209)                     |
| PRAMEF27 | unnamed (+40263)                     |
| PRAMEF6  | unnamed (-68648)                     |
| PRKCQ    | unnamed (-247625), unnamed (-247505) |
| PRODH    | unnamed (-7961), unnamed (-7841)     |
| PTCRA    | unnamed (-18523)                     |
| RPL24    | unnamed (-10778)                     |
| SCGB1A1  | unnamed (-42061), unnamed (-41941)   |
| SENP2    | unnamed (-20289), unnamed (-20169)   |
| SFMBT2   | unnamed (+583560), unnamed (+583680) |
| SGCD     | unnamed (+334286), unnamed (+334406) |
| SKAP1    | unnamed (-53383)                     |
| SLAMF1   | unnamed (-49724)                     |
| TMEM121  | unnamed (+147699)                    |
| TMEM141  | unnamed (-8651)                      |
| TMPRSS15 | unnamed (-160427), unnamed (-160307) |
| TREH     | unnamed (-44792)                     |
| TRIM27   | unnamed (+234782)                    |
| TRPC6    | unnamed (-116970)                    |
| UCK2     | unnamed (+781535)                    |
| UGT2B15  | unnamed (+70875)                     |
| UGT2B17  | unnamed (-31226)                     |
| YY1AP1   | unnamed (+58533), unnamed (+58653)   |
| ZBED9    | unnamed (-101872)                    |
| ZNF16    | unnamed (-74165)                     |
| ZNF420   | unnamed (+31760)                     |

|         |                   |
|---------|-------------------|
| ZNF486  | unnamed (+115119) |
| ZNF525  | unnamed (-4660)   |
| ZNF585A | unnamed (+62501)  |
| ZNF737  | unnamed (+283342) |

POL-region to gene

|         |                                          |
|---------|------------------------------------------|
| unnamed | CTAG1B (+7072), CTAG1A (+27045)          |
| unnamed | EDA2R (+151356), HEPH (+302125)          |
| unnamed | LCN15 (-18191), TMEM141 (-8651)          |
| unnamed | ZNF16 (-74165), C8orf33 (-27325)         |
| unnamed | DEFB107B (+5778), DEFB107A (+314092)     |
| unnamed | FOXK1 (-96134)                           |
| unnamed | FOXK1 (-87630)                           |
| unnamed | MEI4 (+29999)                            |
| unnamed | PTCRA (-18523), C6orf226 (-6650)         |
| unnamed | PPP1R2P3 (-189375), SGCD (+334406)       |
| unnamed | HCN1 (-307160)                           |
| unnamed | CDH6 (-703360)                           |
| unnamed | FRG2 (-82580), DUX4 (-63940)             |
| unnamed | SEN2 (-20169), LIPH (-13392)             |
| unnamed | BOC (-184806), NEPRO (-7883)             |
| unnamed | TMPRSS15 (-160427)                       |
| unnamed | ATP4A (-11552), ENSG00000283758 (-11050) |
| unnamed | NONE                                     |
| unnamed | ATP23 (+389628), LRIG3 (+589317)         |
| unnamed | ALG10 (+601458)                          |
| unnamed | TREH (-44792), DDX6 (+66483)             |
| unnamed | SCGB1A1 (-41941), ASRGL1 (+39646)        |
| unnamed | ABCC2 (+40476), DNMBP (+186711)          |
| unnamed | PRKCQ (-247625), SFMBT2 (+583560)        |
| unnamed | POGK (-231023), UCK2 (+781535)           |
| unnamed | MSTO1 (+19898), YY1AP1 (+58533)          |
| unnamed | ENSA (-4111)                             |
| unnamed | PRAMEF6 (-68648), PRAMEF27 (+40263)      |
| unnamed | ZBED9 (-101872), TRIM27 (+234782)        |
| unnamed | UGT2B17 (-31226), UGT2B15 (+70875)       |
| unnamed | CEP97 (-26365), RPL24 (-10778)           |
| unnamed | PRODH (-7841), DGCR2 (+178060)           |
| unnamed | ZNF525 (-4660)                           |
| unnamed | ZNF486 (+115119), ZNF737 (+283342)       |
| unnamed | TMEM121 (+147699)                        |
| unnamed | PRAMEF13 (-14601), PRAMEF18 (+13375)     |

|         |                                      |
|---------|--------------------------------------|
| unnamed | PRAMEF14 (-11350), PRAMEF19 (+13209) |
| unnamed | SKAP1 (-53383), HOXB1 (+47424)       |
| unnamed | NONE                                 |
| unnamed | PRODH (-7961), DGCR2 (+177940)       |
| unnamed | CEP126 (-214117), TRPC6 (-116970)    |
| unnamed | SLAMF1 (-49724), CD48 (+15149)       |
| unnamed | DEFB107B (+5658), DEFB107A (+314212) |
| unnamed | FOXK1 (-96254)                       |
| unnamed | FOXK1 (-87750)                       |
| unnamed | PPP1R2P3 (-189495), SGCD (+334286)   |
| unnamed | CDH6 (-703480)                       |
| unnamed | SEN2 (-20289), LIPH (-13272)         |
| unnamed | TMPRSS15 (-160307)                   |
| unnamed | ZNF420 (+31760), ZNF585A (+62501)    |
| unnamed | ATP23 (+389508), LRIG3 (+589437)     |
| unnamed | ALG10 (+601338)                      |
| unnamed | SCGB1A1 (-42061), ASRGL1 (+39526)    |
| unnamed | ABCC2 (+40356), DNMBP (+186831)      |
| unnamed | PRKCQ (-247505), SFMBT2 (+583680)    |
| unnamed | MSTO1 (+19778), YY1AP1 (+58653)      |
| unnamed | ENSA (-3991)                         |
| unnamed | GBP1 (-22886), GBP2 (+37868)         |
| unnamed | OSBPL11 (-301045), ALG1L (+38338)    |

ENV-gene to region

|           |                                      |
|-----------|--------------------------------------|
| ABCC2     | unnamed (+39134)                     |
| ADCY10    | unnamed (+142592)                    |
| ADCYAP1R1 | unnamed (+101269)                    |
| ADGRB3    | unnamed (+486155), unnamed (+796938) |
| AIPL1     | unnamed (+259479)                    |
| AKAP11    | unnamed (+204320)                    |
| AKAP9     | unnamed (-51669), unnamed (+86924)   |
| ALG1L     | unnamed (+35750), unnamed (+35889)   |
| ALKAL1    | unnamed (-7145)                      |
| ALOX5     | unnamed (-25537)                     |
| ANOS1     | unnamed (+229793)                    |
| APCDD1    | unnamed (+51322)                     |
| ARHGEF38  | unnamed (-52064)                     |
| ASRGL1    | unnamed (+32070)                     |
| ATG16L2   | unnamed (+96019)                     |
| ATP23     | unnamed (+386918), unnamed (+387062) |
| ATP4A     | unnamed (-8992), unnamed (-8848)     |

|                 |                                      |
|-----------------|--------------------------------------|
| BOC             | unnamed (-187079)                    |
| C16orf72        | unnamed (+74927), unnamed (+258447)  |
| C2CD4C          | unnamed (+22560)                     |
| C3orf38         | unnamed (+154075)                    |
| C6orf226        | unnamed (-3914)                      |
| CALML4          | unnamed (-17064)                     |
| CASP6           | unnamed (+25140)                     |
| CCDC180         | unnamed (-177406)                    |
| CCPG1           | unnamed (-37297)                     |
| CD48            | unnamed (+12852), unnamed (+12996)   |
| CDH6            | unnamed (-705925)                    |
| CEP126          | unnamed (-211668)                    |
| CEP97           | unnamed (-24092), unnamed (-23948)   |
| CES5A           | unnamed (-33822)                     |
| CHMP3           | unnamed (+18622)                     |
| CLN6            | unnamed (+7118)                      |
| COL22A1         | unnamed (-547093), unnamed (-546949) |
| CPSF2           | unnamed (+65626)                     |
| CSF3R           | unnamed (-6725)                      |
| CTSV            | unnamed (-90610)                     |
| CXCR3           | unnamed (-58526)                     |
| CYP51A1         | unnamed (+106739)                    |
| DAD1            | unnamed (+488399)                    |
| DCC             | unnamed (-979142)                    |
| DDX6            | unnamed (+68754), unnamed (+68898)   |
| DEFB107A        | unnamed (+316661), unnamed (+316805) |
| DEFB107B        | unnamed (+3065), unnamed (+3209)     |
| DGCR2           | unnamed (+175639), unnamed (+175783) |
| DNAAF4          | unnamed (+62678)                     |
| DNMBP           | unnamed (+188053)                    |
| DNMT3A          | unnamed (-191929)                    |
| DPPA5           | unnamed (+20922)                     |
| DRD2            | unnamed (-48905)                     |
| DTNB            | unnamed (+139115)                    |
| EIF1AY          | unnamed (-22971)                     |
| EMB             | unnamed (-167254)                    |
| ENSG00000228144 | unnamed (-5229)                      |
| ENSG00000259680 | unnamed (-568000)                    |
| ENSG00000283758 | unnamed (-13754), unnamed (-13610)   |
| EPC1            | unnamed (-158512)                    |
| EPHA3           | unnamed (-803706)                    |
| EPX             | unnamed (+16444)                     |
| FAM174A         | unnamed (+250609)                    |

|         |                                                                        |
|---------|------------------------------------------------------------------------|
| FAM19A3 | unnamed (+8481)                                                        |
| FCHSD2  | unnamed (+231934)                                                      |
| FNIP2   | unnamed (-9323)                                                        |
| FOXK1   | unnamed (-98847), unnamed (-98703), unnamed (-90343), unnamed (-90199) |
| FRMD6   | unnamed (-285246)                                                      |
| FXYD4   | unnamed (-127759)                                                      |
| GABBR2  | unnamed (+244580)                                                      |
| GABRG1  | unnamed (+915282)                                                      |
| GAPT    | unnamed (+71575)                                                       |
| GDNF    | unnamed (+316623)                                                      |
| GHITM   | unnamed (-618755)                                                      |
| GNAL    | unnamed (-74461)                                                       |
| GNAO1   | unnamed (-201930)                                                      |
| GNPDA2  | unnamed (-482204)                                                      |
| GOLPH3  | unnamed (+133008)                                                      |
| GPCPD1  | unnamed (+157369)                                                      |
| GREB1L  | unnamed (-226046)                                                      |
| GRIK3   | unnamed (+544122)                                                      |
| GRIN2A  | unnamed (+832659)                                                      |
| HK3     | unnamed (-85259)                                                       |
| HSPBAP1 | unnamed (+68662)                                                       |
| IPMK    | unnamed (+23397)                                                       |
| IPO5    | unnamed (-178680)                                                      |
| IRAK3   | unnamed (-13665)                                                       |
| ISL2    | unnamed (+563118)                                                      |
| ITGB1   | unnamed (+452197)                                                      |
| KCNK9   | unnamed (+241970), unnamed (+242114)                                   |
| KDM3A   | unnamed (+104054)                                                      |
| KDM5D   | unnamed (-807831)                                                      |
| KHDC1   | unnamed (-23158)                                                       |
| LCN15   | unnamed (-16852)                                                       |
| LCP1    | unnamed (-72666)                                                       |
| LGALS4  | unnamed (+5739)                                                        |
| LGALS7B | unnamed (+18414)                                                       |
| LHX8    | unnamed (+253843), unnamed (+253987)                                   |
| LIMCH1  | unnamed (-47362)                                                       |
| LIPH    | unnamed (-11115)                                                       |
| LMBRD1  | unnamed (+364806), unnamed (+675589)                                   |
| LRCH1   | unnamed (-269246)                                                      |
| LRIG3   | unnamed (+591883), unnamed (+592027)                                   |
| MAGEH1  | unnamed (-80388)                                                       |
| MAPK4   | unnamed (-142677)                                                      |

|          |                                      |
|----------|--------------------------------------|
| MCUB     | unnamed (+118128)                    |
| MED30    | unnamed (-93153)                     |
| MEI4     | unnamed (+27315), unnamed (+27459)   |
| MEX3C    | unnamed (-163710)                    |
| MIS18BP1 | unnamed (-382536)                    |
| MKS1     | unnamed (+10124)                     |
| MNS1     | unnamed (-75786)                     |
| MPZL1    | unnamed (+49560)                     |
| MSANTD3  | unnamed (-36149)                     |
| MSTO1    | unnamed (+17477), unnamed (+17621)   |
| MTERF1   | unnamed (-8478)                      |
| MYRFL    | unnamed (-18209)                     |
| NAPG     | unnamed (-20084)                     |
| NEPRO    | unnamed (-5610)                      |
| NEUROD6  | unnamed (+187164)                    |
| NHSL2    | unnamed (-233782)                    |
| NMUR1    | unnamed (-8222)                      |
| NPFFR1   | unnamed (+45085)                     |
| NRF1     | unnamed (+33193)                     |
| NSUN3    | unnamed (-17971)                     |
| NTRK2    | unnamed (-143501)                    |
| NUF2     | unnamed (+176354)                    |
| NUP37    | unnamed (+30899)                     |
| OPHN1    | unnamed (-45202)                     |
| OR13A1   | unnamed (-39822)                     |
| OR13F1   | unnamed (-269514)                    |
| OR4E2    | unnamed (+447035)                    |
| OSBPL11  | unnamed (-303633), unnamed (-303494) |
| OTP      | unnamed (-121446)                    |
| PAGE3    | unnamed (-106871)                    |
| PALMD    | unnamed (-136995)                    |
| PARP14   | unnamed (+44544)                     |
| PARP8    | unnamed (-58317)                     |
| PDZD2    | unnamed (+401932)                    |
| PLGRKT   | unnamed (+3061)                      |
| PLPPR4   | unnamed (+244995)                    |
| PPA1     | unnamed (-5164)                      |
| PPA2     | unnamed (-26477)                     |
| PPID     | unnamed (-36419)                     |
| PPP1R2P3 | unnamed (-191796), unnamed (-191652) |
| PRDX4    | unnamed (-143837)                    |
| PRODH    | unnamed (-10262), unnamed (-10118)   |
| PROKR2   | unnamed (-139288)                    |



|          |                                      |
|----------|--------------------------------------|
| PTCHD1   | unnamed (+189593)                    |
| PXN      | unnamed (-12242)                     |
| RAB3C    | unnamed (-20030)                     |
| RAB3IP   | unnamed (+67705)                     |
| RAB6C    | unnamed (-16526)                     |
| RALBP1   | unnamed (-44558)                     |
| RAP2A    | unnamed (+340773)                    |
| RASGEF1A | unnamed (-14146)                     |
| RB1CC1   | unnamed (+141780)                    |
| RLN1     | unnamed (-94944)                     |
| ROCK1    | unnamed (-25696)                     |
| RPL24    | unnamed (-13195), unnamed (-13051)   |
| RTP5     | unnamed (+192244)                    |
| SCAPER   | unnamed (+5493)                      |
| SCGB1A1  | unnamed (-49517)                     |
| SENP2    | unnamed (-22446)                     |
| SGCD     | unnamed (+331985), unnamed (+332129) |
| SIRT4    | unnamed (-24308)                     |
| SKA1     | unnamed (+42406)                     |
| SLAMF1   | unnamed (-52021), unnamed (-51877)   |
| SLC16A1  | unnamed (+227163)                    |
| SLC24A4  | unnamed (-136042)                    |
| SLC28A3  | unnamed (-185594)                    |
| SLC30A8  | unnamed (+292232)                    |
| SLC35G4  | unnamed (+4899)                      |
| SLC44A5  | unnamed (+228663), unnamed (+228807) |
| SMC2     | unnamed (+140489)                    |
| ST8SIA4  | unnamed (+117352)                    |
| STX19    | unnamed (-16335)                     |
| SYT6     | unnamed (-90310)                     |
| TBC1D2   | unnamed (-208896)                    |
| TBCA     | unnamed (+15153)                     |
| TEX10    | unnamed (-40426)                     |
| TEX44    | unnamed (-54184)                     |
| THEG     | unnamed (-9940)                      |
| TMEM141  | unnamed (-9990)                      |
| TMEM181  | unnamed (-187744)                    |
| TMPRSS15 | unnamed (-158010)                    |
| TMPRSS5  | unnamed (+182079)                    |
| TMX1     | unnamed (+126533)                    |
| TNFSF11  | unnamed (-97680)                     |
| TREH     | unnamed (-42521), unnamed (-42377)   |
| TRIM26   | unnamed (-8635)                      |

|         |                                    |
|---------|------------------------------------|
| TRIM33  | unnamed (+267933)                  |
| TRIM39  | unnamed (-104843)                  |
| TRIM60  | unnamed (-30070)                   |
| TRIM61  | unnamed (-24215)                   |
| TRPC6   | unnamed (-119419)                  |
| TTC26   | unnamed (+92684)                   |
| TUBA3C  | unnamed (+345573)                  |
| TULP4   | unnamed (+36204)                   |
| TWSG1   | unnamed (+95684)                   |
| UBE2H   | unnamed (+289678)                  |
| UBN2    | unnamed (-5023)                    |
| UCHL1   | unnamed (+233962)                  |
| UIMC1   | unnamed (+21817)                   |
| USP9Y   | unnamed (-248120)                  |
| VCAN    | unnamed (-33498)                   |
| VCX3B   | unnamed (+37563)                   |
| VSTM2A  | unnamed (-97704)                   |
| WASHC3  | unnamed (-27101)                   |
| WDR70   | unnamed (+139992)                  |
| WSCD1   | unnamed (+106600)                  |
| XRCC4   | unnamed (+360374)                  |
| YIPF6   | unnamed (-19316)                   |
| YY1AP1  | unnamed (+60810), unnamed (+60954) |
| ZNF280D | unnamed (+192666)                  |
| ZNF431  | unnamed (+117367)                  |
| ZNF492  | unnamed (-53602)                   |
| ZNF708  | unnamed (+70003)                   |
| ZNF98   | unnamed (-158376)                  |

ENV-region to gene

|         |                                         |
|---------|-----------------------------------------|
| unnamed | COL22A1 (-547093), KCNK9 (+241970)      |
| unnamed | DEFB107B (+3209), DEFB107A (+316661)    |
| unnamed | FOXK1 (-98703)                          |
| unnamed | FOXK1 (-90199)                          |
| unnamed | MEI4 (+27459)                           |
| unnamed | KHDC1 (-23158), DPPA5 (+20922)          |
| unnamed | PPP1R2P3 (-191652), SGCD (+332129)      |
| unnamed | CDH6 (-705925)                          |
| unnamed | SENP2 (-22446), LIPH (-11115)           |
| unnamed | BOC (-187079), NEPRO (-5610)            |
| unnamed | RAB6C (-16526)                          |
| unnamed | ENSG00000283758 (-13610), ATP4A (-8992) |

|         |                                        |
|---------|----------------------------------------|
| unnamed | NONE                                   |
| unnamed | ENSG00000259680 (-568000)              |
| unnamed | ATP23 (+387062), LRIG3 (+591883)       |
| unnamed | TREH (-42521), DDX6 (+68754)           |
| unnamed | MSTO1 (+17621), YY1AP1 (+60810)        |
| unnamed | OSBPL11 (-303494), ALG1L (+35889)      |
| unnamed | CEP97 (-24092), RPL24 (-13051)         |
| unnamed | PRODH (-10118), DGCR2 (+175783)        |
| unnamed | NONE                                   |
| unnamed | CEP126 (-211668), TRPC6 (-119419)      |
| unnamed | SLAMF1 (-51877), CD48 (+12996)         |
| unnamed | SLC44A5 (+228807), LHX8 (+253843)      |
| unnamed | NHSL2 (-233782), CXCR3 (-58526)        |
| unnamed | PRDX4 (-143837), PTCHD1 (+189593)      |
| unnamed | VCX3B (+37563), ANOS1 (+229793)        |
| unnamed | TEX10 (-40426), MSANTD3 (-36149)       |
| unnamed | TBC1D2 (-208896), GABBR2 (+244580)     |
| unnamed | RLN1 (-94944), PLGRKT (+3061)          |
| unnamed | UBN2 (-5023), TTC26 (+92684)           |
| unnamed | AKAP9 (-51669), MTERF1 (-8478)         |
| unnamed | AKAP9 (+86924), CYP51A1 (+106739)      |
| unnamed | VSTM2A (-97704)                        |
| unnamed | ADCYAP1R1 (+101269), NEUROD6 (+187164) |
| unnamed | HK3 (-85259), UIMC1 (+21817)           |
| unnamed | ST8SIA4 (+117352), FAM174A (+250609)   |
| unnamed | OTP (-121446), TBCA (+15153)           |
| unnamed | EMB (-167254), PARP8 (-58317)          |
| unnamed | GOLPH3 (+133008), PDZD2 (+401932)      |
| unnamed | TRIM60 (-30070), TRIM61 (-24215)       |
| unnamed | NONE                                   |
| unnamed | GNPDA2 (-482204), GABRG1 (+915282)     |
| unnamed | OSBPL11 (-303633), ALG1L (+35750)      |
| unnamed | CEP97 (-23948), RPL24 (-13195)         |
| unnamed | EPHA3 (-803706), C3orf38 (+154075)     |
| unnamed | PRODH (-10262), DGCR2 (+175639)        |
| unnamed | PROKR2 (-139288), GPCPD1 (+157369)     |
| unnamed | LGALS4 (+5739), LGALS7B (+18414)       |
| unnamed | ZNF98 (-158376), ZNF492 (-53602)       |
| unnamed | THEG (-9940), C2CD4C (+22560)          |
| unnamed | GNAL (-74461), SLC35G4 (+4899)         |
| unnamed | GNAO1 (-201930), CES5A (-33822)        |
| unnamed | C16orf72 (+74927)                      |
| unnamed | SCAPER (+5493), ISL2 (+563118)         |

|         |                                         |
|---------|-----------------------------------------|
| unnamed | CALML4 (-17064), CLN6 (+7118)           |
| unnamed | MNS1 (-75786), ZNF280D (+192666)        |
| unnamed | FRMD6 (-285246), TMX1 (+126533)         |
| unnamed | MIS18BP1 (-382536)                      |
| unnamed | IPO5 (-178680), RAP2A (+340773)         |
| unnamed | LRCH1 (-269246), LCP1 (-72666)          |
| unnamed | TNFSF11 (-97680), AKAP11 (+204320)      |
| unnamed | IRAK3 (-13665), ENSG00000228144 (-5229) |
| unnamed | DRD2 (-48905), TMPRSS5 (+182079)        |
| unnamed | ATG16L2 (+96019), FCHSD2 (+231934)      |
| unnamed | GHITM (-618755)                         |
| unnamed | IPMK (+23397)                           |
| unnamed | OR13A1 (-39822), ALOX5 (-25537)         |
| unnamed | FXYD4 (-127759), RASGEF1A (-14146)      |
| unnamed | SYT6 (-90310), TRIM33 (+267933)         |
| unnamed | PALMD (-136995), PLPPR4 (+244995)       |
| unnamed | SLC44A5 (+228663), LHX8 (+253987)       |
| unnamed | USP9Y (-248120)                         |
| unnamed | PAGE3 (-106871), MAGEH1 (-80388)        |
| unnamed | LCN15 (-16852), TMEM141 (-9990)         |
| unnamed | OR13F1 (-269514), SMC2 (+140489)        |
| unnamed | CCDC180 (-177406), CTSV (-90610)        |
| unnamed | SLC28A3 (-185594), NTRK2 (-143501)      |
| unnamed | COL22A1 (-546949), KCNK9 (+242114)      |
| unnamed | ALKAL1 (-7145), RB1CC1 (+141780)        |
| unnamed | DEFB107B (+3065), DEFB107A (+316805)    |
| unnamed | NRF1 (+33193), UBE2H (+289678)          |
| unnamed | FOXK1 (-98847)                          |
| unnamed | FOXK1 (-90343)                          |
| unnamed | TMEM181 (-187744), TULP4 (+36204)       |
| unnamed | MEI4 (+27315)                           |
| unnamed | ADGRB3 (+486155), LMBRD1 (+675589)      |
| unnamed | LMBRD1 (+364806), ADGRB3 (+796938)      |
| unnamed | TRIM39 (-104843), TRIM26 (-8635)        |
| unnamed | PPP1R2P3 (-191796), SGCD (+331985)      |
| unnamed | RAB3C (-20030), GAPT (+71575)           |
| unnamed | WDR70 (+139992), GDNF (+316623)         |
| unnamed | CASP6 (+25140), MCUB (+118128)          |
| unnamed | ARHGEF38 (-52064), PPA2 (-26477)        |
| unnamed | LIMCH1 (-47362), UCHL1 (+233962)        |
| unnamed | PARP14 (+44544), HSPBAP1 (+68662)       |
| unnamed | TMPRSS15 (-158010)                      |
| unnamed | RTP5 (+192244)                          |

|         |                                         |
|---------|-----------------------------------------|
| unnamed | TEX44 (-54184), NMUR1 (-8222)           |
| unnamed | CHMP3 (+18622), KDM3A (+104054)         |
| unnamed | ENSG00000283758 (-13754), ATP4A (-8848) |
| unnamed | NONE                                    |
| unnamed | ZNF708 (+70003), ZNF431 (+117367)       |
| unnamed | DCC (-979142), MEX3C (-163710)          |
| unnamed | MAPK4 (-142677), SKA1 (+42406)          |
| unnamed | GREB1L (-226046), ROCK1 (-25696)        |
| unnamed | NAPG (-20084), APCDD1 (+51322)          |
| unnamed | RALBP1 (-44558), TWSG1 (+95684)         |
| unnamed | MKS1 (+10124), EPX (+16444)             |
| unnamed | WSCD1 (+106600), AIPL1 (+259479)        |
| unnamed | C16orf72 (+258447), GRIN2A (+832659)    |
| unnamed | CCPG1 (-37297), DNAAF4 (+62678)         |
| unnamed | SLC24A4 (-136042), CPSF2 (+65626)       |
| unnamed | OR4E2 (+447035), DAD1 (+488399)         |
| unnamed | TUBA3C (+345573)                        |
| unnamed | SIRT4 (-24308), PXN (-12242)            |
| unnamed | WASHC3 (-27101), NUP37 (+30899)         |
| unnamed | MYRFL (-18209), RAB3IP (+67705)         |
| unnamed | ATP23 (+386918), LRIG3 (+592027)        |
| unnamed | TREH (-42377), DDX6 (+68898)            |
| unnamed | ABCC2 (+39134), DNMBP (+188053)         |
| unnamed | PPA1 (-5164), NPFFR1 (+45085)           |
| unnamed | EPC1 (-158512), ITGB1 (+452197)         |
| unnamed | MPZL1 (+49560), ADCY10 (+142592)        |
| unnamed | NUF2 (+176354)                          |
| unnamed | MSTO1 (+17477), YY1AP1 (+60954)         |
| unnamed | KDM5D (-807831), EIF1AY (-22971)        |
| unnamed | OPHN1 (-45202), YIPF6 (-19316)          |
| unnamed | MED30 (-93153), SLC30A8 (+292232)       |
| unnamed | VCAN (-33498), XRCC4 (+360374)          |
| unnamed | NSUN3 (-17971), STX19 (-16335)          |
| unnamed | SLAMF1 (-52021), CD48 (+12852)          |
| unnamed | FAM19A3 (+8481), SLC16A1 (+227163)      |
| unnamed | PPID (-36419), FNIP2 (-9323)            |
| unnamed | C6orf226 (-3914)                        |
| unnamed | DNMT3A (-191929), DTNB (+139115)        |
| unnamed | SCGB1A1 (-49517), ASRGL1 (+32070)       |
| unnamed | CSF3R (-6725), GRIK3 (+544122)          |
